# Supplementary material for: Water Services Provision in Rapidly Urbanising Villages: A Comparison of Rural and Urban Governance in Mumbai and Chennai regions in India
Source: Royal Society of Chemistry journal article supplement (doi:10.1039/d5ew00935a), 2026-01-01
Supplement: d5ew00935a1.pdf [file d5ew00935a1.pdf]

**A-5**

**Definitions of Town types and Codes for Settlement types**

| Codes for Town |                    |                                                                                                                                                                                                                                                                                                                                                                                                                                                                                                                                                                                                                                                                                                                                                                                                                                                                                                                                                                                                                                                                                                                                                                                                |
|----------------|--------------------|------------------------------------------------------------------------------------------------------------------------------------------------------------------------------------------------------------------------------------------------------------------------------------------------------------------------------------------------------------------------------------------------------------------------------------------------------------------------------------------------------------------------------------------------------------------------------------------------------------------------------------------------------------------------------------------------------------------------------------------------------------------------------------------------------------------------------------------------------------------------------------------------------------------------------------------------------------------------------------------------------------------------------------------------------------------------------------------------------------------------------------------------------------------------------------------------|
| S.No.          | Type of Town       | Definition/ Code                                                                                                                                                                                                                                                                                                                                                                                                                                                                                                                                                                                                                                                                                                                                                                                                                                                                                                                                                                                                                                                                                                                                                                               |
| 1              | Young Census town  | <p>A village with (i)a minimum population of 5,000 persons; ii) 75 per cent and above of the male main working population engaged in non-agricultural pursuits; and; iii) a density of population of at least 400 persons per square kilometres, which was identified by the Census of India as a census town for the first time in the last held census in India in 2011.</p> <p>The source of this data on census towns in Tamil Nadu state is the Government of India, Office of the Registrar General and Census Commissioner, District Census Handbook, Kancheepuram district, Village and Town-wise Primary Census Abstract.<br/><a href="https://censusindia.gov.in/nada/index.php/catalog/45355">https://censusindia.gov.in/nada/index.php/catalog/45355</a></p> <p>The source for the list of census towns in Maharashtra state is the Government of India, Office of the Registrar General and Census Commissioner, District Census Handbook, Thane district, Village and Town-wise Primary Census Abstract.<br/><a href="https://censusindia.gov.in/nada/index.php/catalog/834">https://censusindia.gov.in/nada/index.php/catalog/834</a></p>                                       |
| 2              | Old Census town    | <p>A village with (i)a minimum population of 5,000 persons; ii) 75 per cent and above of the male main working population engaged in non-agricultural pursuits; and; iii) a density of population of at least 400 persons per square kilometres, which was identified by the Census of India as a census town in census held in India in 2001 and was retained as a census town in the census held in 2011 also.</p> <p>The source of this data on census towns in Tamil Nadu state is the Government of India, Office of the Registrar General and Census Commissioner, District Census Handbook, Kancheepuram district, Village and Town-wise Primary Census Abstract.<br/><a href="https://censusindia.gov.in/nada/index.php/catalog/45355">https://censusindia.gov.in/nada/index.php/catalog/45355</a></p> <p>The source for the list of census towns in Maharashtra state is the Government of India, Office of the Registrar General and Census Commissioner, District Census Handbook, Thane district, Village and Town-wise Primary Census Abstract.<br/><a href="https://censusindia.gov.in/nada/index.php/catalog/834">https://censusindia.gov.in/nada/index.php/catalog/834</a></p> |
| 3              | Statutory town     | A statutory town is an administrative unit defined by statute as urban, such as a Municipal Corporation or Municipality.                                                                                                                                                                                                                                                                                                                                                                                                                                                                                                                                                                                                                                                                                                                                                                                                                                                                                                                                                                                                                                                                       |
| S.No.          | Type of settlement | Code                                                                                                                                                                                                                                                                                                                                                                                                                                                                                                                                                                                                                                                                                                                                                                                                                                                                                                                                                                                                                                                                                                                                                                                           |
| 1              | Apartment          | Multi-storied buildings with several housing units, occupied by high and middle-income families. Those residing in the                                                                                                                                                                                                                                                                                                                                                                                                                                                                                                                                                                                                                                                                                                                                                                                                                                                                                                                                                                                                                                                                         |

|   |                                |                                                                                                                                                                                                                                                                                                                                                                                                                                           |
|---|--------------------------------|-------------------------------------------------------------------------------------------------------------------------------------------------------------------------------------------------------------------------------------------------------------------------------------------------------------------------------------------------------------------------------------------------------------------------------------------|
|   |                                | individual housing units may be owners or may be on lease.                                                                                                                                                                                                                                                                                                                                                                                |
| 2 | Low-income settlement          | Multi-storied buildings with several housing units, occupied by high and middle-income families. Those residing in the individual housing units may be owners or may be on lease. Cluster of several small housing units occupied by low-income households. Construction is mostly temporary or semi-permanent. Mostly, these settlements are found on government-owned common land and, sometimes, on privately owned land, paying rent. |
| 3 | Long-term resident settlements | Areas occupied by the long-term residents, who have been living in the town for several generations, are identified by the key informants in the town, namely elected representatives and officials of local governments, and community leaders. These settlements include independent houses of varying sizes and comprise all income groups.                                                                                            |
